# Supplementary material for: Comparative density functional studies of pristine and doped bismuth ferrite polymorphs by GGA+U and meta-GGA SCAN+U
Source: Royal Society of Chemistry journal article supplement (doi:10.1039/d0cp06157c), 2021-01-01
Supplement: d0cp06157c1.pdf [file d0cp06157c1.pdf]

**Electronic Supplementary Materials (ESI) for the Article  
„Comparative density functional studies of pristine and doped bismuth ferrite  
polymorphs by GGA+*U* and meta-GGA SCAN+*U*”**

by

**J. Kaczkowski, M. Pugaczowa-Michalska, and I. Płowaś-Korus**

Table S1. The extended version of Table 1 from the article including uncertainties of the obtained values calculated in relation to the experimental one

|                        | GGA                         | GGA+ <i>U</i><br>( <i>U</i> = 4 eV) | HSE                         | SCAN                       | SCAN+ <i>U</i><br>( <i>U</i> = 1 eV) | SCAN+ <i>U</i><br>( <i>U</i> = 2 eV) | SCAN+ <i>U</i><br>( <i>U</i> = 3 eV) | SCAN+ <i>U</i><br>( <i>U</i> = 4 eV) | Exp.      |
|------------------------|-----------------------------|-------------------------------------|-----------------------------|----------------------------|--------------------------------------|--------------------------------------|--------------------------------------|--------------------------------------|-----------|
| $a_{rh}$ [Å]           | 5.682<br>(+0.9%)            | 5.682<br>(+0.9%)                    | 5.645<br>(+0.2%)            | 5.594<br>(-0.7%)           | 5.602<br>(-0.6%)                     | 5.601<br>(-0.6%)                     | 5.603<br>(-0.6%)                     | 5.599<br>(-0.6%)                     | 5.634     |
| $\alpha_{rh}$ [°]      | 59.19<br>(-0.3%)            | 59.12<br>(-0.4%)                    | 59.05<br>(-0.5%)            | 59.59<br>(+0.4%)           | 59.47<br>(+0.2%)                     | 59.47<br>(+0.2%)                     | 59.46<br>(+0.2%)                     | 59.41<br>(+0.1%)                     | 59.35     |
| Bi-O [Å]               | 2.478<br>(-1.3%)            | 2.482<br>(-1.1%)                    | 2.501<br>(-0.4%)            | 2.478<br>(-1.3%)           | 2.486<br>(-0.9%)                     | 2.487<br>(-0.9%)                     | 2.492<br>(-0.7%)                     | 2.491<br>(-0.7%)                     | 2.510     |
| Bi-O [Å]               | 2.315<br>(+1.9%)            | 2.331<br>(+2.6%)                    | 2.264<br>(-0.3%)            | 2.289<br>(+0.8%)           | 2.291<br>(+0.9%)                     | 2.293<br>(+0.9%)                     | 2.293<br>(+0.9%)                     | 2.295<br>(+1.0%)                     | 2.271     |
| Fe-O [Å]               | 2.163<br>(+2.5%)            | 2.119<br>(+0.4%)                    | 2.123<br>(+0.6%)            | 2.105<br>(-0.2%)           | 2.097<br>(-0.6%)                     | 2.090<br>(-0.9%)                     | 2.085<br>(-1.2%)                     | 2.076<br>(-1.6%)                     | 2.110     |
| Fe-O [Å]               | 1.957<br>(-0.1%)            | 1.980<br>(+1.1%)                    | 1.948<br>(-0.5%)            | 1.946<br>(-0.6%)           | 1.945<br>(-0.6%)                     | 1.953<br>(-0.3%)                     | 1.956<br>(-0.1%)                     | 1.958<br>(0.0%)                      | 1.958     |
| O-Fe-O [°]             | 164.14<br>(-0.5%)           | 166.83<br>(+1.1%)                   | 164.67<br>(-0.2%)           | 165.15<br>(+0.1%)          | 165.69<br>(+0.4%)                    | 166.07<br>(+0.6%)                    | 166.40<br>(+0.8%)                    | 166.92<br>(+1.1%)                    | 165.04    |
| $E_g$ [eV]             | 1.08<br>(-61.4%)            | 2.24<br>(-20.0%)                    | 3.41<br>(+21.7%)            | 1.75<br>(-37.5%)           | 2.03<br>(-27.5%)                     | 2.28<br>(-18.6%)                     | 2.44<br>(-12.8%)                     | 2.51<br>(-10.4%)                     | 2.8       |
| $\mu_{Fe}$ [ $\mu_B$ ] | 3.73<br>(-0.5% ~<br>-13.9%) | 4.11<br>(+9.6% ~<br>-5.1%)          | 4.16<br>(+10.9%<br>~ -3.9%) | 3.98<br>(+6.1%<br>~ -8.1%) | 4.05<br>(+8.0% ~<br>-6.5%)           | 4.10<br>(+9.3% ~<br>-5.3%)           | 4.16<br>(+10.9% ~<br>-3.9%)          | 4.21<br>(+12.3% ~<br>-2.8%)          | 3.75-4.33 |

Table S2. The calculated magnitudes of the ferroelectric polarization of the investigated BiFeO<sub>3</sub> polymorphs. The components of the ferroelectric polarization of *Cm-C* and *Ima2-G* phases was also given in parentheses. The results were obtained within GGA+*U* and SCAN+*U*

|                           | GGA+ <i>U</i> |                    | SCAN+ <i>U</i> |                    |
|---------------------------|---------------|--------------------|----------------|--------------------|
| <i>R3c-G</i>              |               |                    |                |                    |
| pristine                  | 90.7          |                    | 90.9           |                    |
| Al                        | 89.8          |                    | 91.0           |                    |
| Ga                        | 91.0          |                    | 91.5           |                    |
| In                        | 93.9          |                    | 93.6           |                    |
| Sc                        | 93.0          |                    | 94.2           |                    |
| <i>Pna2<sub>1</sub>-G</i> |               |                    |                |                    |
| pristine                  | 48.6          |                    | 63.5           |                    |
| Al                        | 47.9          |                    | 64.0           |                    |
| Ga                        | 51.2          |                    | 65.0           |                    |
| In                        | 55.1          |                    | 65.2           |                    |
| Sc                        | 53.4          |                    | 65.2           |                    |
| <i>P4mm-C</i>             |               |                    |                |                    |
| pristine                  | 142.8         |                    | 138.2          |                    |
| Al                        | 139.1         |                    | 134.7          |                    |
| Ga                        | 141.1         |                    | 137.1          |                    |
| In                        | 144.6         |                    | 139.0          |                    |
| Sc                        | 143.4         |                    | 138.9          |                    |
| <i>Cm-C</i>               |               |                    |                |                    |
| pristine                  | 143.5         | (43.4; 0.0; 137.8) | 141.2          | (53.2; 0.0; 131.8) |
| Al                        | 143.0         | (50.9; 0.0; 134.8) | 136.4          | (52.0; 0.0; 127.0) |
| Ga                        | 144.8         | (51.4; 0.0; 136.5) | 139.4          | (52.7; 0.0; 131.8) |
| In                        | 143.4         | (54.2; 0.0; 133.9) | 138.3          | (55.9; 0.0; 127.5) |
| Sc                        | 146.5         | (55.0; 0.0; 137.1) | 139.7          | (57.2; 0.0; 128.6) |
| <i>Ima2-G</i>             |               |                    |                |                    |
| pristine                  | 89.2          | (63.2; 62.9; 0.0)  | 87.7           | (62.2; 61.7; 0.0)  |
| Al                        | 84.6          | (58.5; 61.2; 0.0)  | 86.1           | (59.8; 61.9; 0.0)  |
| Ga                        | 86.4          | (60.3; 61.9; 0.0)  | 86.6           | (60.8; 61.8; 0.0)  |
| In                        | 83.6          | (58.4; 59.7; 0.0)  | 86.8           | (61.1; 61.6; 0.0)  |
| Sc                        | 86.5          | (60.4; 61.9; 0.0)  | 87.8           | (61.6; 62.6; 0.0)  |

Table S3. The optimized pseudocubic lattice parameter for selected BiFeO<sub>3</sub> polymorphs without and with dopants calculated within GGA+*U* and SCAN+*U* with the optimal values of the Hubbard *U* parameter

|                      | a [Å] | b [Å] | c [Å] | $\alpha$ | $\beta$ | $\gamma$ |
|----------------------|-------|-------|-------|----------|---------|----------|
| <b><i>R3c-G</i></b>  |       |       |       |          |         |          |
| SCAN+ <i>U</i>       |       |       |       |          |         |          |
| pristine             | 7.879 | 7.879 | 7.879 | 89.56    | 89.56   | 89.56    |
| Al                   | 7.853 | 7.853 | 7.853 | 89.52    | 89.52   | 89.52    |
| Ga                   | 7.880 | 7.880 | 7.880 | 89.49    | 89.49   | 89.49    |
| In                   | 7.945 | 7.945 | 7.945 | 89.47    | 89.47   | 89.47    |
| Sc                   | 7.929 | 7.929 | 7.929 | 89.38    | 89.38   | 89.38    |
| GGA+ <i>U</i>        |       |       |       |          |         |          |
| pristine             | 7.985 | 7.985 | 7.985 | 89.21    | 89.21   | 89.21    |
| Al                   | 7.952 | 7.952 | 7.952 | 89.26    | 89.26   | 89.26    |
| Ga                   | 7.984 | 7.984 | 7.984 | 89.23    | 89.23   | 89.23    |
| In                   | 8.054 | 8.054 | 8.054 | 89.10    | 89.10   | 89.10    |
| Sc                   | 8.019 | 8.019 | 8.019 | 89.14    | 89.14   | 89.14    |
| <b><i>P4mm-C</i></b> |       |       |       |          |         |          |
| SCAN+ <i>U</i>       |       |       |       |          |         |          |
| pristine             | 7.438 | 7.438 | 9.435 | 90.0     | 90.0    | 90.0     |
| Al                   | 7.417 | 7.417 | 9.377 | 90.0     | 90.0    | 90.0     |
| Ga                   | 7.429 | 7.429 | 9.452 | 90.0     | 90.0    | 90.0     |
| In                   | 7.463 | 7.463 | 9.577 | 90.0     | 90.0    | 90.0     |
| Sc                   | 7.470 | 7.470 | 9.491 | 90.0     | 90.0    | 90.0     |
| GGA+ <i>U</i>        |       |       |       |          |         |          |
| pristine             | 7.494 | 7.494 | 9.706 | 90.0     | 90.0    | 90.0     |
| Al                   | 7.468 | 7.468 | 9.642 | 90.0     | 90.0    | 90.0     |
| Ga                   | 7.487 | 7.487 | 9.712 | 90.0     | 90.0    | 90.0     |
| In                   | 7.521 | 7.521 | 9.863 | 90.0     | 90.0    | 90.0     |
| Sc                   | 7.522 | 7.522 | 9.770 | 90.0     | 90.0    | 90.0     |
| <b><i>Cm-C</i></b>   |       |       |       |          |         |          |
| SCAN+ <i>U</i>       |       |       |       |          |         |          |
| pristine             | 7.511 | 7.511 | 9.440 | 87.83    | 87.83   | 89.71    |
| Al                   | 7.488 | 7.488 | 9.354 | 87.95    | 87.95   | 89.69    |
| Ga                   | 7.499 | 7.499 | 9.445 | 87.86    | 87.86   | 89.71    |
| In                   | 7.562 | 7.562 | 9.535 | 87.80    | 87.80   | 89.66    |
| Sc                   | 7.568 | 7.568 | 9.440 | 87.81    | 87.81   | 89.69    |
| GGA+ <i>U</i>        |       |       |       |          |         |          |
| pristine             | 7.573 | 7.573 | 9.775 | 87.39    | 87.39   | 89.69    |
| Al                   | 7.549 | 7.549 | 9.701 | 87.47    | 87.47   | 89.62    |
| Ga                   | 7.569 | 7.569 | 9.780 | 87.39    | 87.39   | 89.61    |
| In                   | 7.635 | 7.635 | 9.905 | 87.14    | 87.14   | 89.54    |
| Sc                   | 7.621 | 7.621 | 9.814 | 87.19    | 87.19   | 89.59    |

| <b><i>Pna2<sub>1</sub>-G</i></b> |       |       |       |       |       |       |
|----------------------------------|-------|-------|-------|-------|-------|-------|
| SCAN+U                           |       |       |       |       |       |       |
| pristine                         | 7.791 | 7.791 | 8.017 | 90.0  | 90.0  | 88.36 |
| Al                               | 7.756 | 7.761 | 8.003 | 89.97 | 89.80 | 88.56 |
| Ga                               | 7.780 | 7.781 | 8.039 | 90.0  | 89.95 | 88.44 |
| In                               | 7.846 | 7.840 | 8.093 | 90.0  | 90.26 | 88.22 |
| Sc                               | 7.828 | 7.827 | 8.064 | 89.99 | 90.15 | 88.26 |
| GGA+U                            |       |       |       |       |       |       |
| pristine                         | 7.905 | 7.905 | 7.979 | 90.0  | 90.0  | 88.07 |
| Al                               | 7.878 | 7.889 | 7.927 | 90.0  | 89.87 | 88.04 |
| Ga                               | 7.906 | 7.906 | 7.968 | 90.0  | 89.97 | 87.98 |
| In                               | 7.975 | 7.964 | 8.046 | 89.94 | 90.30 | 87.80 |
| Sc                               | 7.936 | 7.937 | 7.999 | 89.95 | 90.12 | 87.85 |
| <b><i>Ima2-G</i></b>             |       |       |       |       |       |       |
| SCAN+U                           |       |       |       |       |       |       |
| pristine                         | 7.973 | 7.973 | 7.744 | 90.0  | 90.0  | 89.43 |
| Al                               | 7.944 | 7.944 | 7.708 | 90.06 | 90.06 | 89.47 |
| Ga                               | 7.969 | 7.969 | 7.737 | 90.02 | 90.02 | 89.46 |
| In                               | 8.041 | 8.041 | 7.802 | 89.75 | 89.75 | 89.43 |
| Sc                               | 8.019 | 8.019 | 7.784 | 89.91 | 89.91 | 89.43 |
| GGA+U                            |       |       |       |       |       |       |
| pristine                         | 8.079 | 8.079 | 7.825 | 90.0  | 90.0  | 89.06 |
| Al                               | 8.033 | 8.033 | 7.805 | 90.04 | 90.04 | 89.25 |
| Ga                               | 8.065 | 8.065 | 7.830 | 90.01 | 90.01 | 89.27 |
| In                               | 8.112 | 8.112 | 7.925 | 89.76 | 89.76 | 89.09 |
| Sc                               | 8.102 | 8.102 | 7.884 | 89.91 | 89.91 | 89.18 |
| <b><i>Pnma-G</i></b>             |       |       |       |       |       |       |
| SCAN+U                           |       |       |       |       |       |       |
| pristine                         | 7.805 | 7.805 | 7.768 | 90.0  | 90.0  | 87.81 |
| Al                               | 7.775 | 7.777 | 7.744 | 90.0  | 89.96 | 88.03 |
| Ga                               | 7.800 | 7.802 | 7.765 | 90.02 | 89.96 | 87.85 |
| In                               | 7.861 | 7.862 | 7.816 | 89.98 | 90.07 | 87.44 |
| Sc                               | 7.838 | 7.844 | 7.805 | 89.96 | 90.06 | 87.62 |
| GGA+U                            |       |       |       |       |       |       |
| pristine                         | 7.904 | 7.904 | 7.844 | 90.0  | 90.0  | 87.59 |
| Al                               | 7.877 | 7.878 | 7.817 | 90.02 | 89.94 | 87.77 |
| Ga                               | 7.904 | 7.905 | 7.839 | 90.03 | 89.95 | 87.63 |
| In                               | 7.964 | 7.964 | 7.894 | 89.93 | 90.11 | 87.31 |
| Sc                               | 7.932 | 7.934 | 7.875 | 89.91 | 90.07 | 87.46 |

Table S4. The values of the Fe-O-Fe bond angles for the doped rhombohedral  $R3c$ -G, orthorhombic  $Pna2_1$ -G, and monoclinic  $Cm$ -C BiFeO<sub>3</sub> polymorphs optimized within GGA+ $U$  and SCAN+ $U$ . The numbers at the Fe atoms refer to the Figure 8 in the article.

| <i>R3c</i> -G              |                                    |           |           |                                    |           |           |                      |           |           |  |
|----------------------------|------------------------------------|-----------|-----------|------------------------------------|-----------|-----------|----------------------|-----------|-----------|--|
|                            | Fe1-O-Fe2; Fe1-O-Fe3;<br>Fe1-O-Fe5 |           |           | Fe2-O-Fe4; Fe3-O-Fe7;<br>Fe5-O-Fe6 |           |           | Fe5-O-Fe7; Fe3-O-Fe4 |           |           |  |
| GGA+ $U$                   |                                    |           |           |                                    |           |           |                      |           |           |  |
| BAFO                       | 153.49                             |           |           | 154.41                             |           |           | 153.76               |           |           |  |
| BGFO                       | 153.69                             |           |           | 153.90                             |           |           | 153.46               |           |           |  |
| BSFO                       | 153.59                             |           |           | 152.93                             |           |           | 152.89               |           |           |  |
| BIFO                       | 155.21                             |           |           | 154.00                             |           |           | 150.97               |           |           |  |
| SCAN+ $U$                  |                                    |           |           |                                    |           |           |                      |           |           |  |
| BAFO                       | 154.61                             |           |           | 155.62                             |           |           | 155.36               |           |           |  |
| BGFO                       | 155.21                             |           |           | 155.60                             |           |           | 154.82               |           |           |  |
| BSFO                       | 155.78                             |           |           | 155.04                             |           |           | 154.23               |           |           |  |
| BIFO                       | 156.95                             |           |           | 155.77                             |           |           | 152.03               |           |           |  |
| <i>Pna2<sub>1</sub></i> -G |                                    |           |           |                                    |           |           |                      |           |           |  |
|                            | Fe1-O-Fe2                          | Fe2-O-Fe3 | Fe3-O-Fe4 | Fe4-O-Fe1                          | Fe5-O-Fe6 | Fe5-O-Fe7 | Fe2-O-Fe7            | Fe3-O-Fe5 | Fe4-O-Fe6 |  |
| GGA+ $U$                   |                                    |           |           |                                    |           |           |                      |           |           |  |
| BAFO                       | 151.94                             | 149.72    | 149.51    | 150.98                             | 150.78    | 150.79    | 152.75               | 152.23    | 152.96    |  |
| BGFO                       | 150.88                             | 149.51    | 149.86    | 150.35                             | 150.53    | 150.75    | 153.01               | 153.07    | 152.79    |  |
| BSFO                       | 149.27                             | 149.43    | 150.17    | 150.01                             | 149.93    | 149.52    | 152.72               | 153.16    | 151.74    |  |
| BIFO                       | 148.66                             | 149.37    | 151.52    | 149.83                             | 149.75    | 148.98    | 153.08               | 154.04    | 150.94    |  |
| SCAN+ $U$                  |                                    |           |           |                                    |           |           |                      |           |           |  |
| BAFO                       | 155.38                             | 150.40    | 150.23    | 154.65                             | 154.48    | 155.30    | 156.54               | 155.75    | 156.93    |  |
| BGFO                       | 154.34                             | 150.17    | 150.66    | 154.12                             | 154.17    | 154.15    | 156.45               | 156.78    | 156.30    |  |
| BSFO                       | 152.49                             | 150.58    | 150.90    | 153.51                             | 152.82    | 152.20    | 155.92               | 156.28    | 154.97    |  |
| BIFO                       | 152.00                             | 150.43    | 151.94    | 153.52                             | 152.58    | 151.29    | 156.23               | 156.96    | 154.34    |  |
| <i>Cm</i> -C               |                                    |           |           |                                    |           |           |                      |           |           |  |
|                            | Fe1-O-Fe3                          |           | Fe3-O-Fe2 |                                    | Fe4-O-Fe5 |           | Fe4-O-Fe6            |           | Fe5-O-Fe7 |  |
| GGA+ $U$                   |                                    |           |           |                                    |           |           |                      |           |           |  |
| BAFO                       | 141.50                             |           | 141.89    |                                    | 140.61    |           | 141.39               |           | 141.48    |  |
| BGFO                       | 141.34                             |           | 141.40    |                                    | 141.26    |           | 141.39               |           | 141.37    |  |
| BSFO                       | 142.15                             |           | 141.60    |                                    | 143.40    |           | 142.32               |           | 142.31    |  |
| BIFO                       | 140.12                             |           | 143.41    |                                    | 142.52    |           | 144.59               |           | 143.27    |  |
| SCAN+ $U$                  |                                    |           |           |                                    |           |           |                      |           |           |  |
| BAFO                       | 144.51                             |           | 142.85    |                                    | 143.33    |           | 142.02               |           | 142.96    |  |
| BGFO                       | 143.01                             |           | 143.22    |                                    | 142.97    |           | 143.24               |           | 143.07    |  |
| BSFO                       | 144.02                             |           | 144.58    |                                    | 145.45    |           | 145.44               |           | 145.33    |  |
| BIFO                       | 141.64                             |           | 146.20    |                                    | 144.00    |           | 147.54               |           | 145.86    |  |

Table S5. The elements of the Born effective charge tensors for the *Cm-C* phase

|      | xx     | yy     | zz     | xy     | xz     | yx     | yz     | zx     | zy     |
|------|--------|--------|--------|--------|--------|--------|--------|--------|--------|
| BFO  |        |        |        |        |        |        |        |        |        |
| Fe   | 3.271  | 3.285  | 3.877  | 0.000  | 0.366  | 0.000  | 0.000  | 0.649  | 0.000  |
| O1   | -2.592 | -2.272 | -3.307 | 0.000  | -0.559 | 0.000  | 0.000  | -0.716 | 0.000  |
| O2   | -2.891 | -2.896 | -2.065 | 0.036  | -0.115 | -0.001 | 0.311  | -0.028 | 0.146  |
| BAFO |        |        |        |        |        |        |        |        |        |
| Al   | 3.032  | 3.072  | 3.519  | 0.000  | 0.278  | 0.000  | 0.000  | 0.111  | 0.000  |
| O1   | -2.834 | -2.352 | -2.524 | 0.000  | -0.541 | 0.000  | 0.000  | -0.574 | 0.000  |
| O2   | -2.765 | -2.721 | -2.152 | -0.164 | 0.037  | -0.118 | 0.180  | 0.141  | -0.037 |
| O3   | -2.812 | -2.777 | -2.113 | -0.184 | -0.232 | -0.246 | 0.376  | -0.207 | 0.213  |
| O4   | -2.765 | -2.721 | -2.152 | 0.164  | 0.037  | 0.118  | -0.180 | 0.141  | 0.037  |
| O5   | -2.812 | -2.777 | -2.113 | 0.184  | -0.232 | 0.246  | -0.376 | -0.207 | -0.213 |
| BGFO |        |        |        |        |        |        |        |        |        |
| Ga   | 3.185  | 3.202  | 3.607  | 0.000  | 0.268  | 0.000  | 0.000  | 0.098  | 0.000  |
| O1   | -2.826 | -2.508 | -2.569 | 0.000  | -0.430 | 0.000  | 0.000  | -0.590 | 0.000  |
| O2   | -2.809 | -2.814 | -2.111 | -0.176 | -0.025 | -0.163 | 0.205  | 0.106  | -0.024 |
| O3   | -2.847 | -2.845 | -2.158 | -0.097 | -0.213 | -0.175 | 0.388  | -0.145 | 0.222  |
| O4   | -2.809 | -2.814 | -2.111 | 0.176  | -0.025 | 0.163  | -0.205 | 0.106  | 0.024  |
| O5   | -2.847 | -2.845 | -2.158 | 0.097  | -0.213 | 0.175  | -0.388 | -0.145 | -0.222 |
| BIFO |        |        |        |        |        |        |        |        |        |
| In   | 3.238  | 3.154  | 3.815  | 0.000  | 0.176  | 0.000  | 0.000  | 0.029  | 0.000  |
| O1   | -2.801 | -2.874 | -2.547 | 0.000  | -0.267 | 0.000  | 0.000  | -0.479 | 0.000  |
| O2   | -2.814 | -2.900 | -2.020 | -0.389 | -0.064 | -0.432 | 0.184  | 0.142  | -0.041 |
| O3   | -2.808 | -2.941 | -2.248 | -0.023 | -0.210 | -0.157 | 0.490  | -0.119 | 0.383  |
| O4   | -2.814 | -2.900 | -2.020 | 0.389  | -0.064 | 0.432  | -0.184 | 0.142  | 0.041  |
| O5   | -2.808 | -2.941 | -2.248 | 0.023  | -0.210 | 0.157  | -0.490 | -0.119 | -0.383 |
| BSFO |        |        |        |        |        |        |        |        |        |
| Sc   | 3.722  | 3.648  | 4.356  | 0.000  | 0.299  | -0.000 | 0.000  | 0.122  | 0.000  |
| O1   | -2.714 | -2.426 | -3.439 | 0.000  | -0.559 | -0.000 | 0.000  | -0.615 | 0.000  |
| O2   | -3.023 | -3.061 | -2.065 | 0.005  | -0.121 | -0.041 | 0.326  | -0.007 | 0.167  |
| O3   | -3.004 | -3.084 | -2.140 | 0.167  | -0.073 | 0.094  | 0.379  | -0.021 | 0.259  |
| O4   | -3.023 | -3.061 | -2.065 | -0.005 | -0.121 | 0.041  | -0.326 | -0.007 | -0.167 |
| O5   | -3.004 | -3.083 | -2.140 | -0.167 | -0.073 | -0.094 | -0.379 | -0.021 | -0.259 |

Table S6. The elements of the Born effective charge tensors for the  $Pna2_1$ -G phase

|      | xx     | yy     | zz     | xy     | xz     | yx     | yz     | zx     | zy     |
|------|--------|--------|--------|--------|--------|--------|--------|--------|--------|
| BFO  |        |        |        |        |        |        |        |        |        |
| Fe   | 3.963  | 3.860  | 3.985  | 0.295  | 0.356  | 0.073  | 0.167  | 0.038  | 0.307  |
| O1   | -2.728 | -3.220 | -2.869 | 0.032  | 0.664  | 0.320  | 0.466  | 0.554  | 0.264  |
| O2   | -3.345 | -2.214 | -3.242 | 0.281  | -0.107 | 0.174  | -0.118 | -0.127 | -0.214 |
| O3   | -2.775 | -2.939 | -2.981 | -0.091 | -0.539 | -0.154 | 0.459  | -0.409 | 0.436  |
| O4   | -2.728 | -3.220 | -2.869 | -0.032 | 0.664  | -0.320 | -0.466 | 0.554  | -0.264 |
| O5   | -3.345 | -2.214 | -3.242 | 0.281  | 0.107  | 0.174  | 0.118  | 0.127  | 0.214  |
| O6   | -2.775 | -2.939 | -2.981 | -0.091 | 0.539  | -0.154 | -0.459 | 0.409  | -0.436 |
| BAFO |        |        |        |        |        |        |        |        |        |
| Al   | 3.342  | 3.390  | 3.349  | 0.230  | 0.272  | 0.109  | 0.168  | 0.116  | 0.188  |
| O1   | -2.811 | -2.893 | -2.917 | 0.097  | 0.605  | 0.374  | 0.495  | 0.488  | 0.346  |
| O2   | -3.190 | -2.342 | -2.994 | 0.314  | -0.375 | 0.174  | -0.211 | -0.423 | -0.340 |
| O3   | -2.464 | -2.994 | -2.873 | -0.026 | -0.273 | -0.196 | 0.479  | -0.131 | 0.500  |
| O4   | -2.863 | -2.562 | -2.937 | 0.036  | 0.686  | -0.223 | -0.334 | 0.611  | -0.127 |
| O5   | -3.041 | -2.313 | -3.111 | 0.126  | 0.439  | 0.068  | 0.088  | 0.449  | 0.180  |
| O6   | -2.671 | -3.068 | -2.664 | -0.153 | 0.220  | -0.206 | -0.488 | 0.049  | -0.400 |
| BGFO |        |        |        |        |        |        |        |        |        |
| Ga   | 3.606  | 3.644  | 3.595  | 0.215  | 0.261  | 0.113  | 0.184  | 0.144  | 0.149  |
| O1   | -2.796 | -2.995 | -2.932 | 0.094  | 0.704  | 0.391  | 0.537  | 0.576  | 0.388  |
| O2   | -3.286 | -2.271 | -3.065 | 0.337  | -0.336 | 0.202  | -0.179 | -0.406 | -0.316 |
| O3   | -2.474 | -3.018 | -2.922 | -0.037 | -0.342 | -0.157 | 0.444  | -0.208 | 0.466  |
| O4   | -2.842 | -2.716 | -2.948 | 0.056  | 0.730  | -0.248 | -0.342 | 0.626  | -0.102 |
| O5   | -3.116 | -2.262 | -3.169 | 0.156  | 0.385  | 0.099  | 0.060  | 0.400  | 0.162  |
| O6   | -2.707 | -3.054 | -2.644 | -0.111 | 0.307  | -0.167 | -0.452 | 0.157  | -0.389 |
| BIFO |        |        |        |        |        |        |        |        |        |
| In   | 3.632  | 3.671  | 3.633  | 0.177  | 0.171  | 0.118  | 0.173  | 0.148  | 0.098  |
| O1   | -2.757 | -2.940 | -2.961 | 0.071  | 0.819  | 0.353  | 0.595  | 0.644  | 0.492  |
| O2   | -3.368 | -2.198 | -3.029 | 0.427  | -0.361 | 0.287  | -0.167 | -0.477 | -0.311 |
| O3   | -2.315 | -3.111 | -2.991 | -0.047 | -0.270 | -0.104 | 0.363  | -0.198 | 0.421  |
| O4   | -2.836 | -2.623 | -2.986 | 0.084  | 0.819  | -0.229 | -0.247 | 0.679  | 0.015  |
| O5   | -3.075 | -2.179 | -3.227 | 0.181  | 0.471  | 0.091  | -0.085 | 0.479  | -0.006 |
| O6   | -2.777 | -3.061 | -2.439 | -0.049 | 0.338  | -0.073 | -0.412 | 0.172  | -0.365 |
| BSFO |        |        |        |        |        |        |        |        |        |
| Sc   | 4.415  | 4.254  | 4.420  | 0.284  | 0.186  | 0.120  | 0.256  | 0.168  | 0.139  |
| O1   | -2.710 | -3.411 | -2.867 | 0.021  | 0.667  | 0.301  | 0.518  | 0.526  | 0.344  |
| O2   | -3.526 | -2.219 | -3.321 | 0.338  | 0.036  | 0.232  | -0.097 | -0.046 | -0.161 |
| O3   | -2.820 | -3.026 | -3.159 | -0.079 | -0.570 | -0.148 | 0.394  | -0.490 | 0.443  |
| O4   | -2.771 | -3.341 | -2.940 | -0.023 | 0.652  | -0.316 | -0.419 | 0.535  | -0.198 |
| O5   | -3.429 | -2.209 | -3.397 | 0.333  | 0.046  | 0.205  | 0.042  | 0.020  | 0.097  |
| O6   | -2.963 | -2.981 | -3.055 | -0.112 | 0.686  | -0.084 | -0.499 | 0.478  | -0.372 |

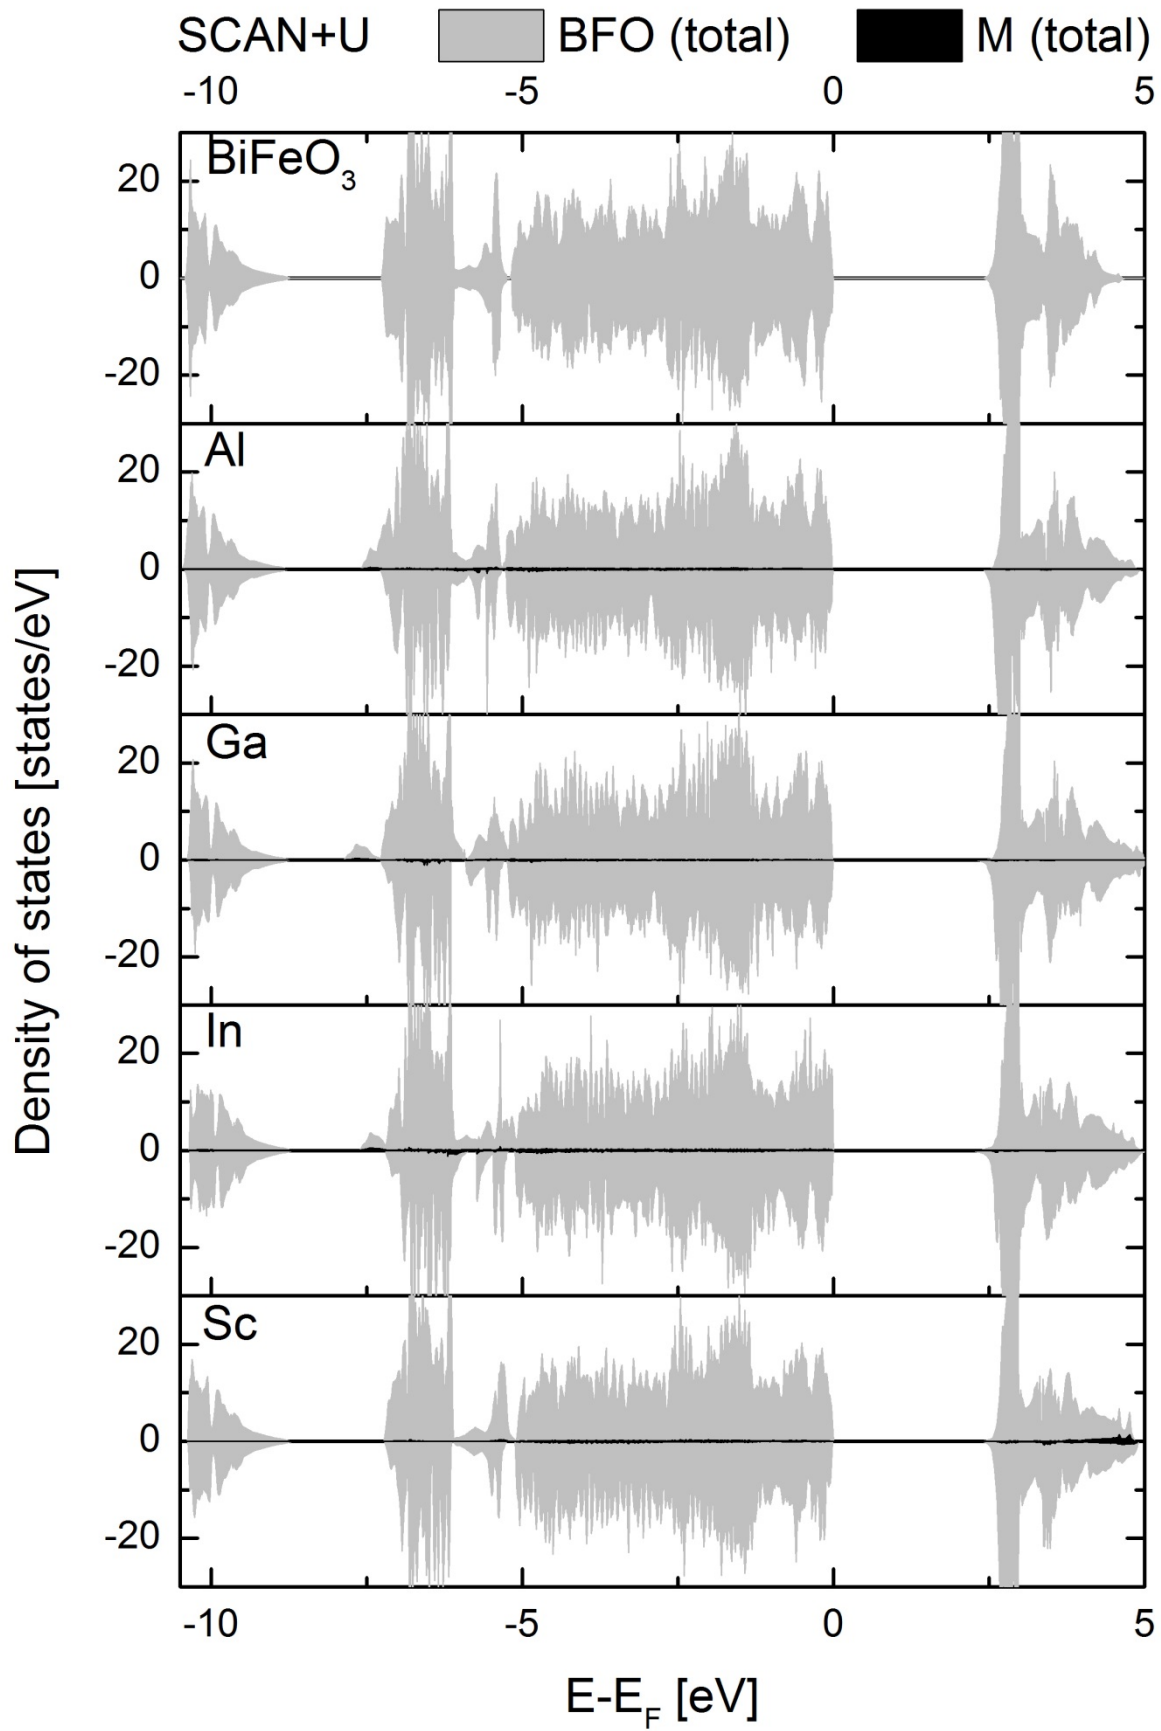

Fig. S1. The total density of states of the rhomboedral  $R3c$ -G phase of BFO without and with dopants
